# Supplementary material
Source: PubMed Central journal article supplement (PMC8276595)

# Supplementary Figure 7

A

## CAST transposition to mobile genetic element

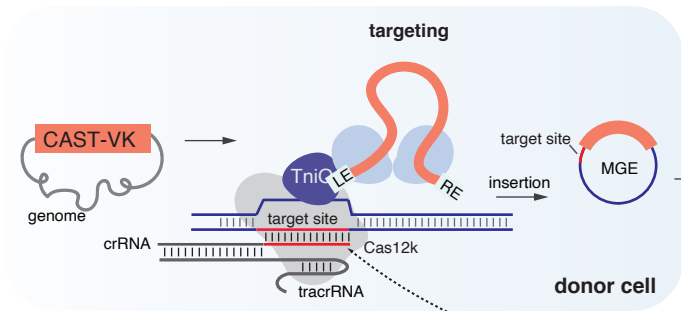

## Tn homing at attachment site

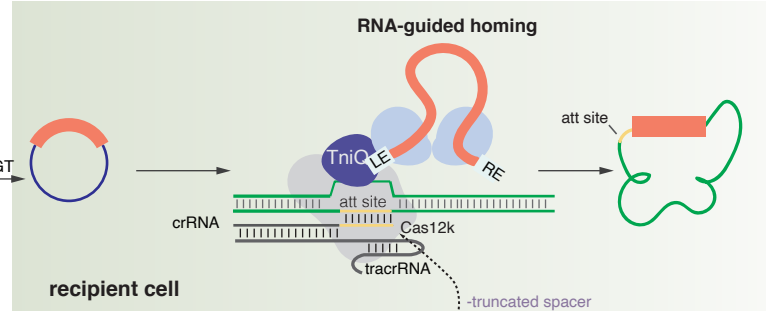

CAST V-K

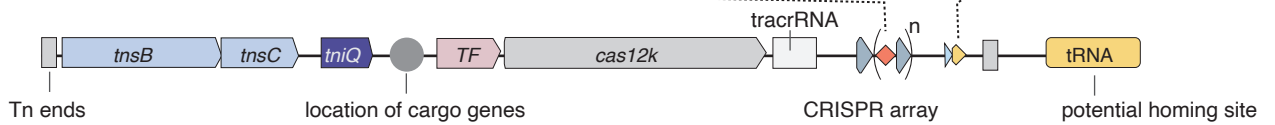

B

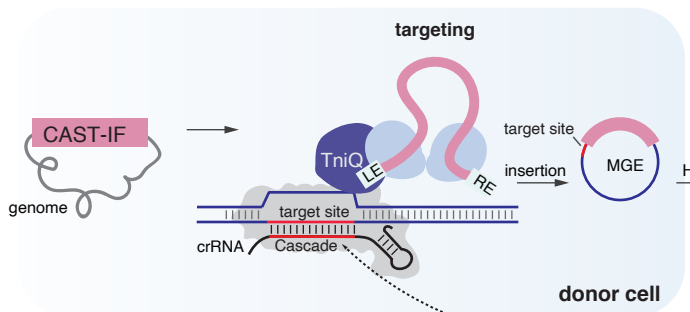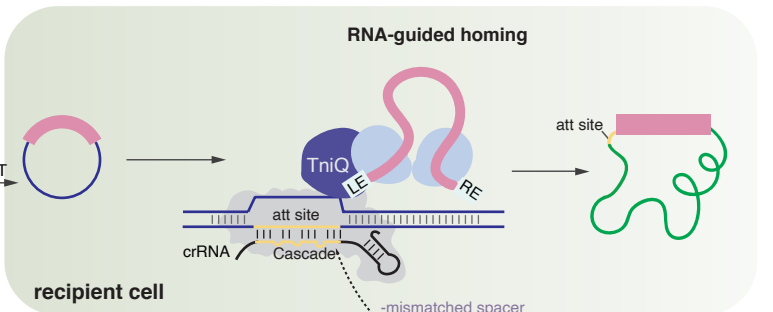

CAST I-F

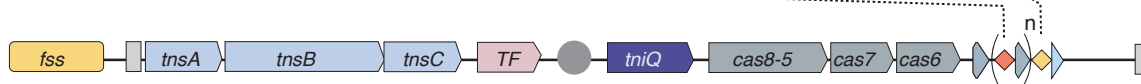

Supplement: NIHMS1716197-supplement-Figures_S7.pdf [file NIHMS1716197-supplement-Figures_S7.pdf]
