# Supplementary material
Source: PubMed Central journal article supplement (PMC8276595)

# Supplementary Figure 1

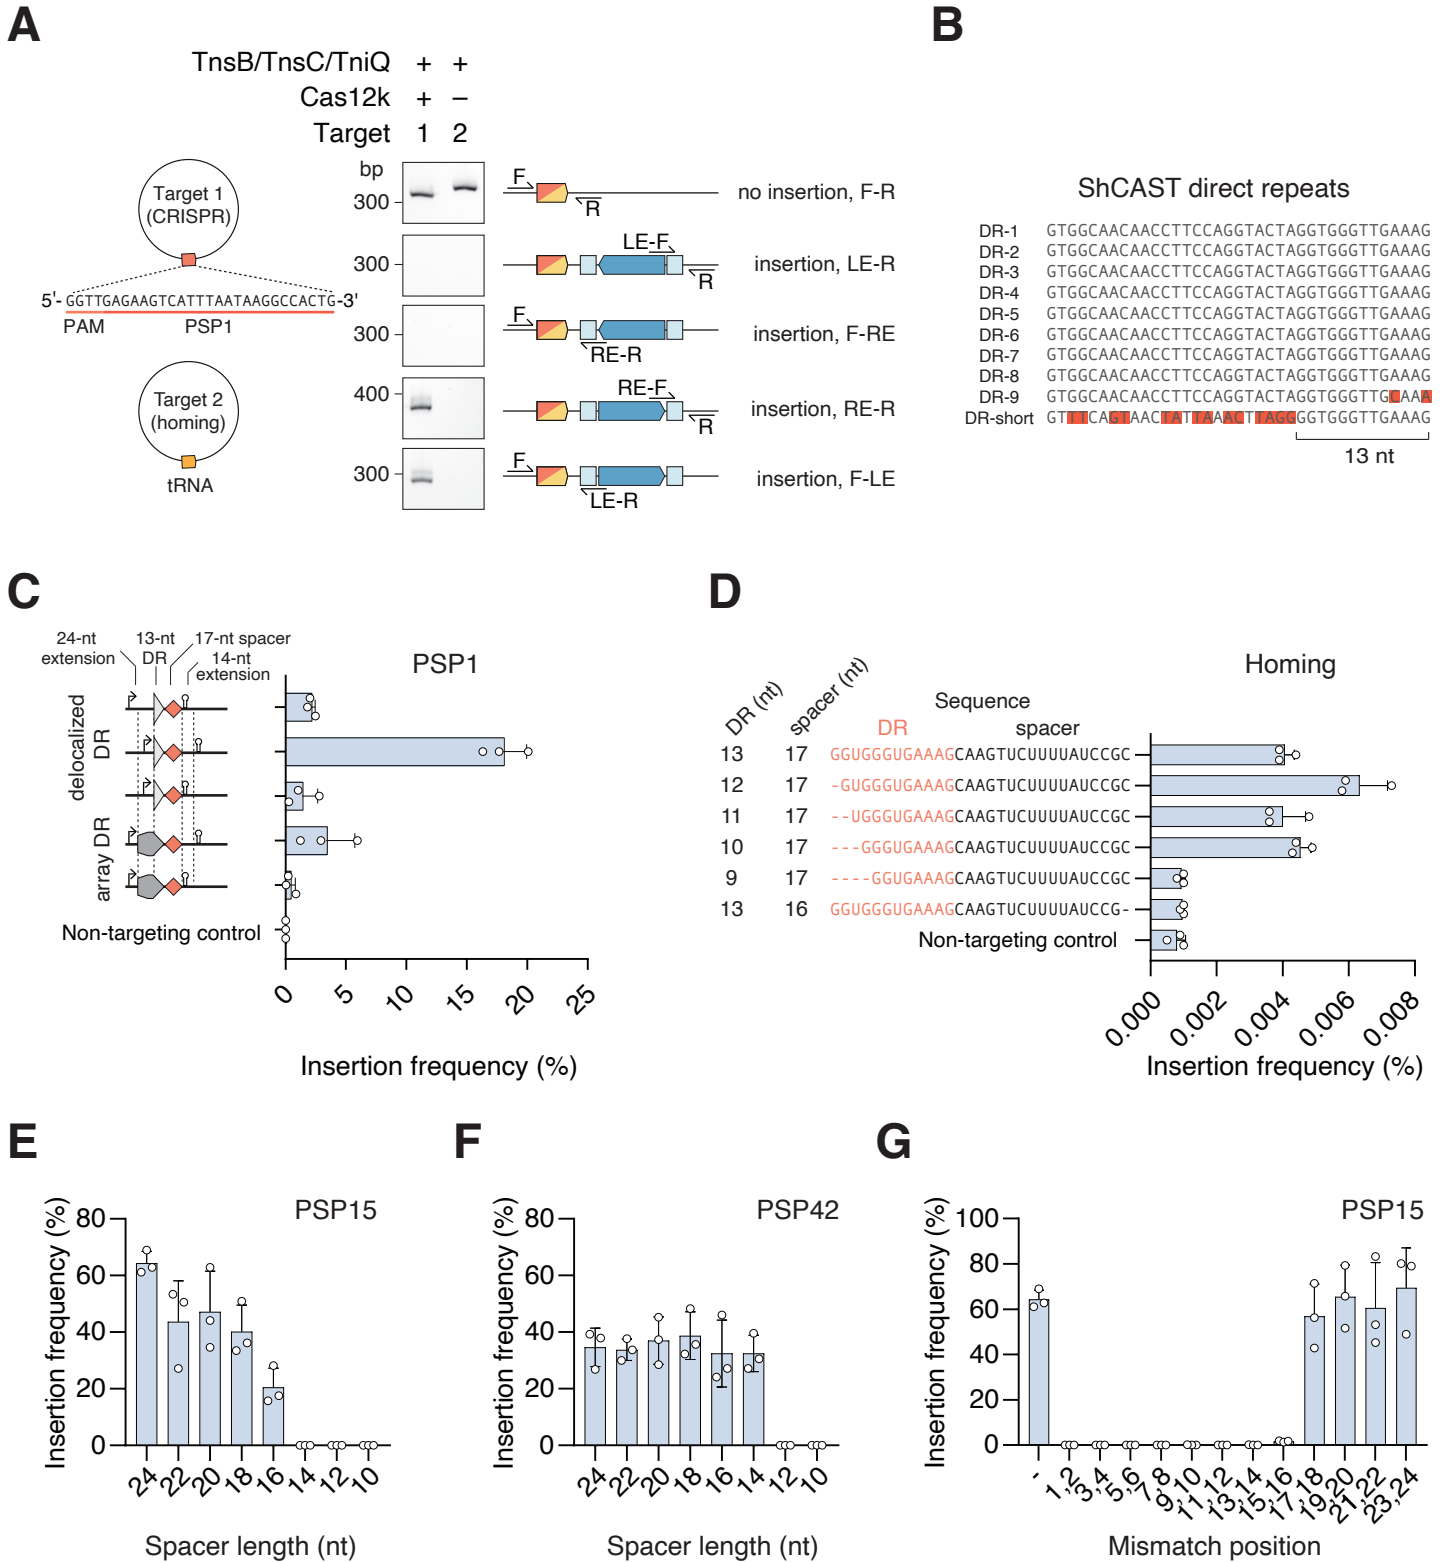

Supplement: NIHMS1716197-supplement-Figure_S1.pdf [file NIHMS1716197-supplement-Figure_S1.pdf]

# Supplementary Figure 2

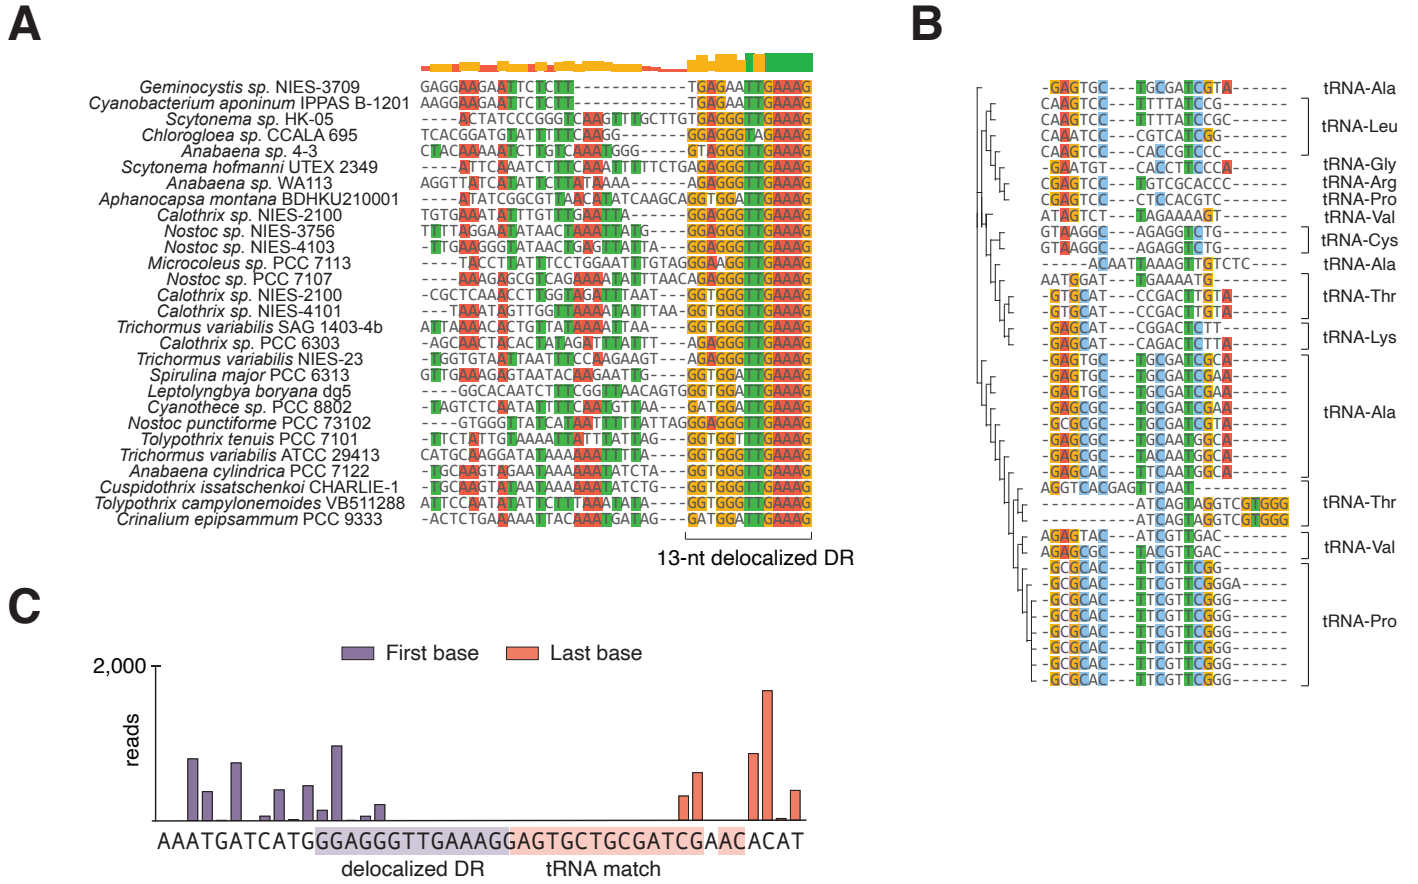

Supplement: NIHMS1716197-supplement-Figure_S2.pdf [file NIHMS1716197-supplement-Figure_S2.pdf]

# Supplementary Figure 3

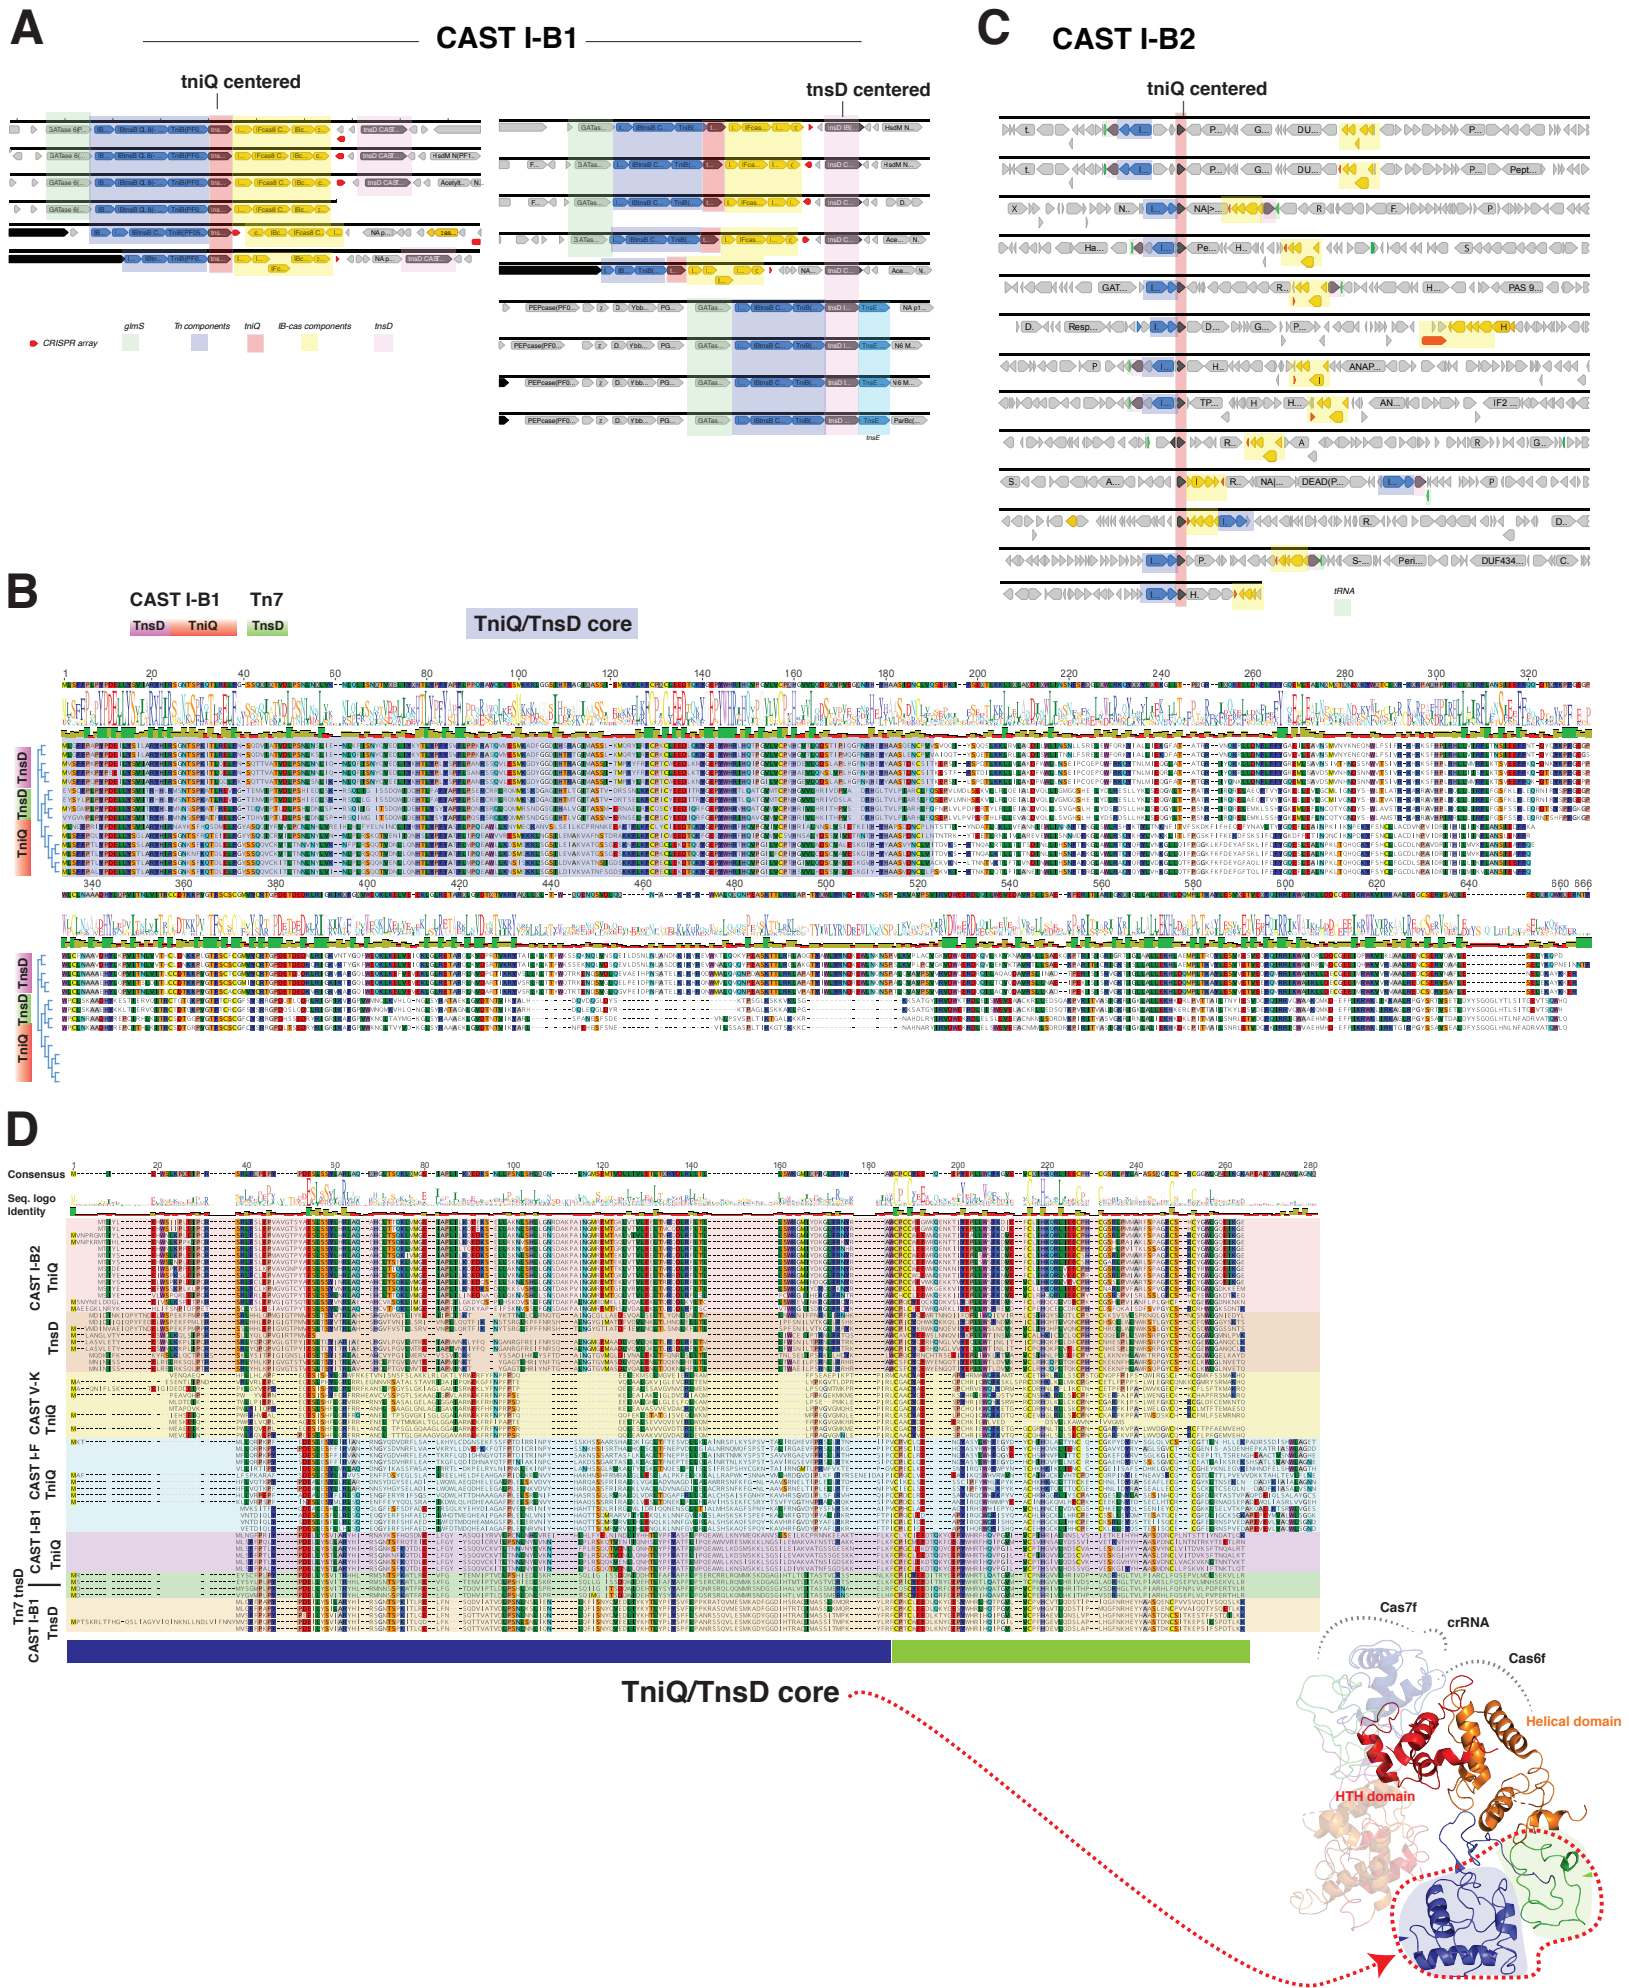

Supplement: NIHMS1716197-supplement-Figure_S3.pdf [file NIHMS1716197-supplement-Figure_S3.pdf]

# Supplementary Figure 4

**A**

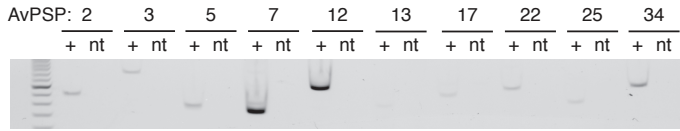

**B**

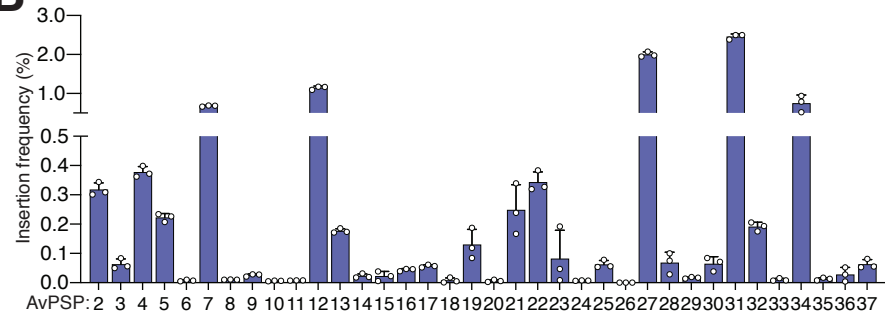

**C**

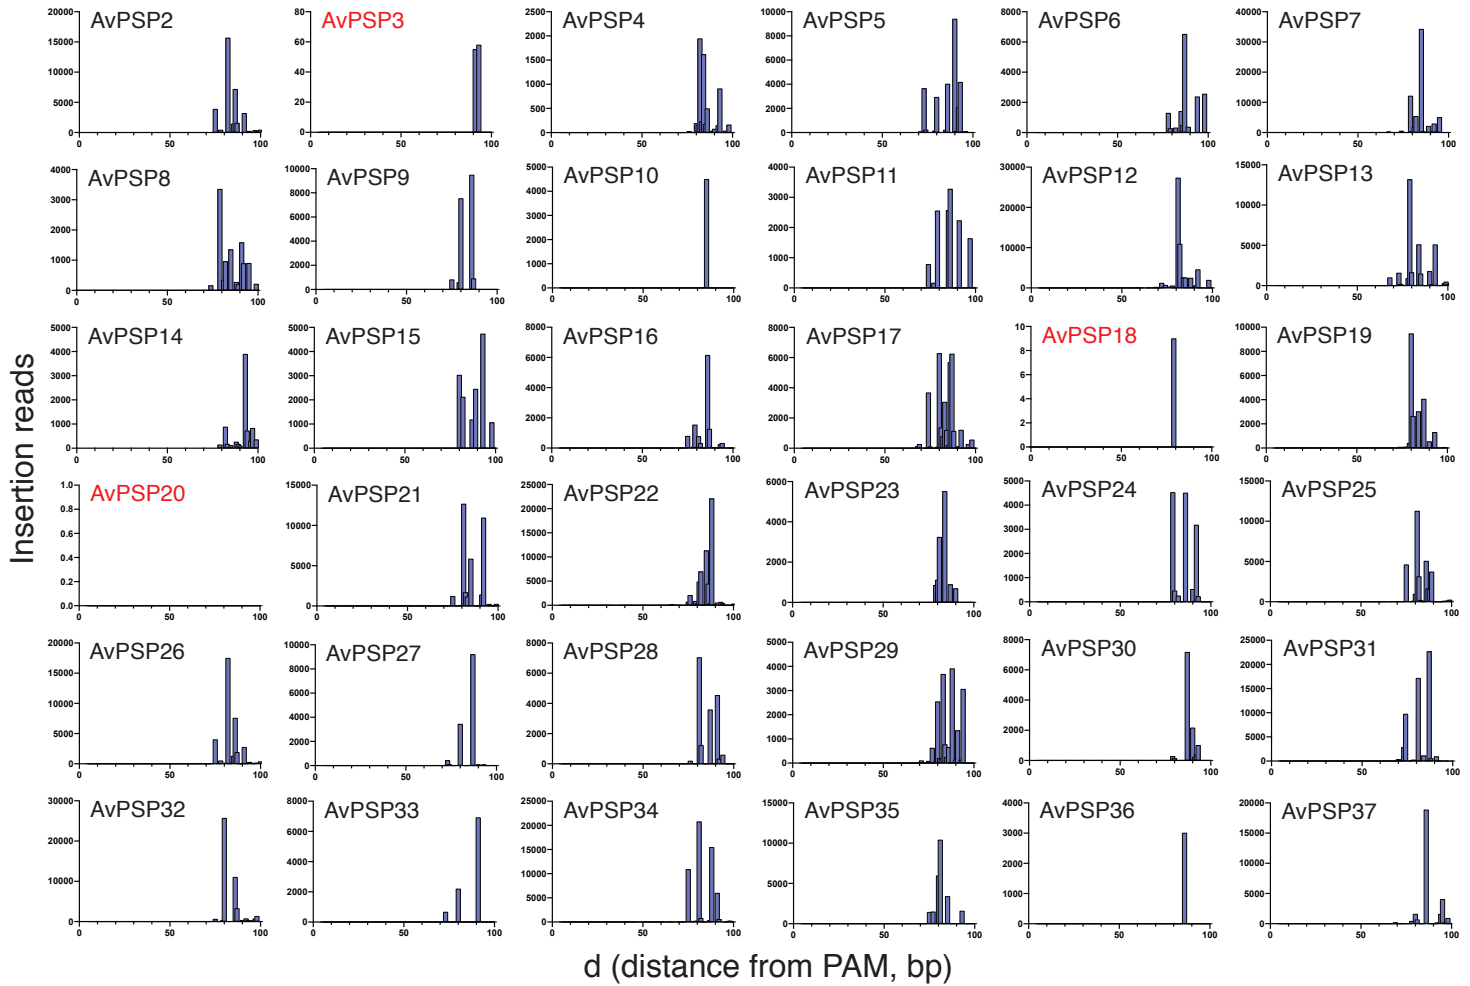

**D**

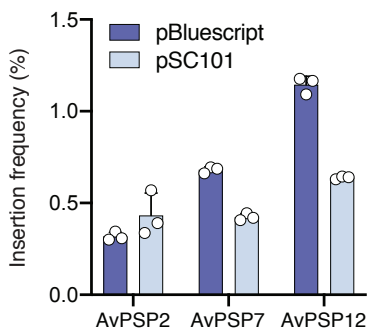

**E**

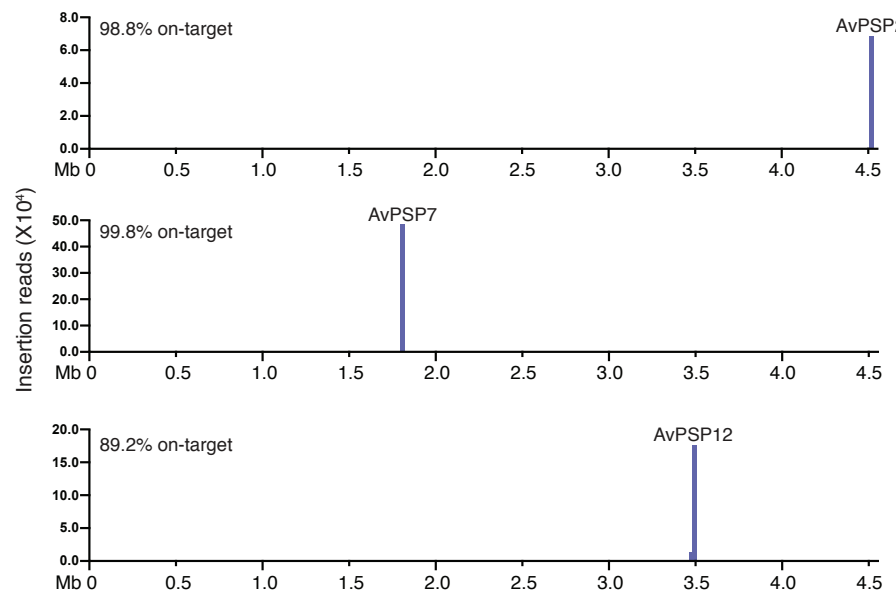

Supplement: NIHMS1716197-supplement-Figure_S4.pdf [file NIHMS1716197-supplement-Figure_S4.pdf]

# Supplementary Figure 5

**A**

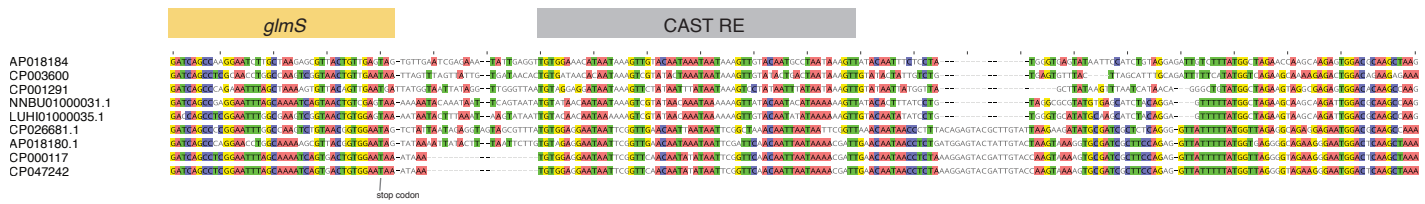

**B**

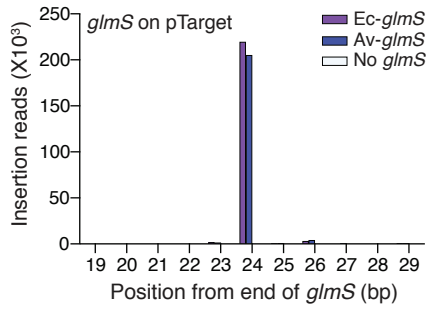

**C** Homing to *glmS* on *E. coli* BL21(DE3) genome

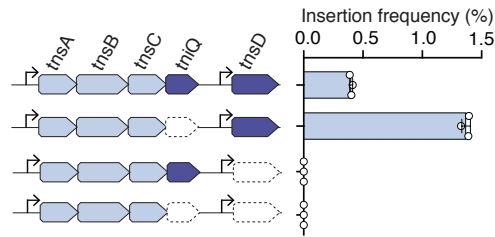

**D**

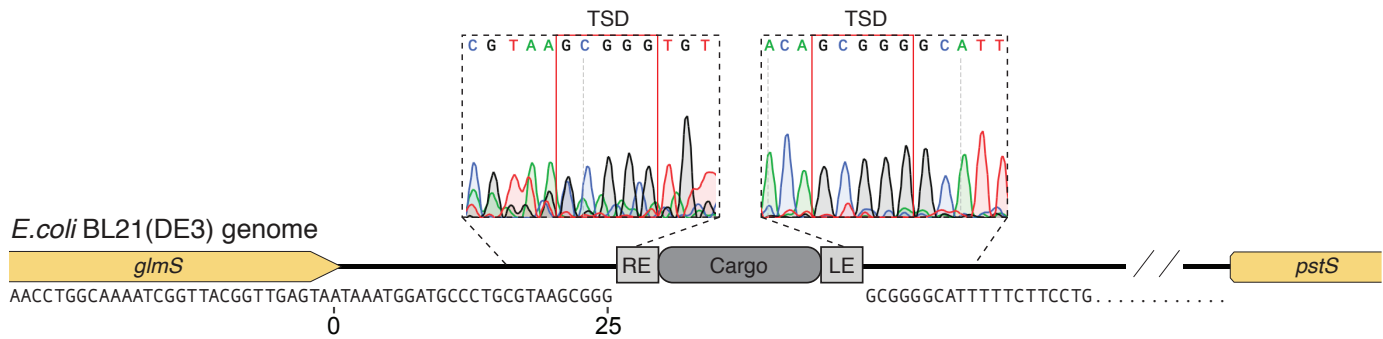

**E**

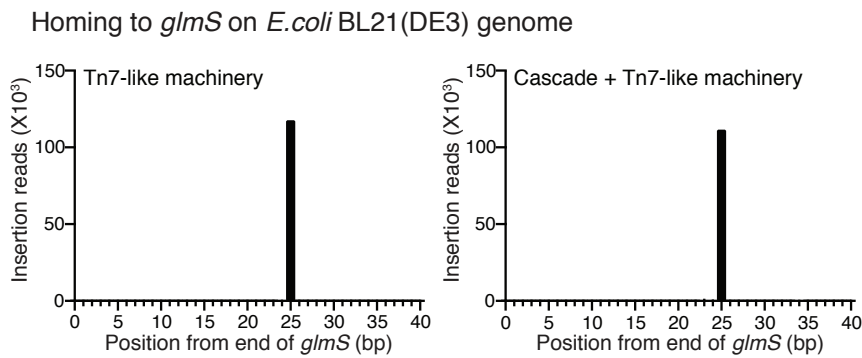

**F**

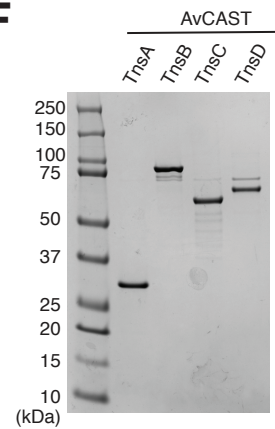

Supplement: NIHMS1716197-supplement-Figure_S5.pdf [file NIHMS1716197-supplement-Figure_S5.pdf]

# Supplementary Figure 6

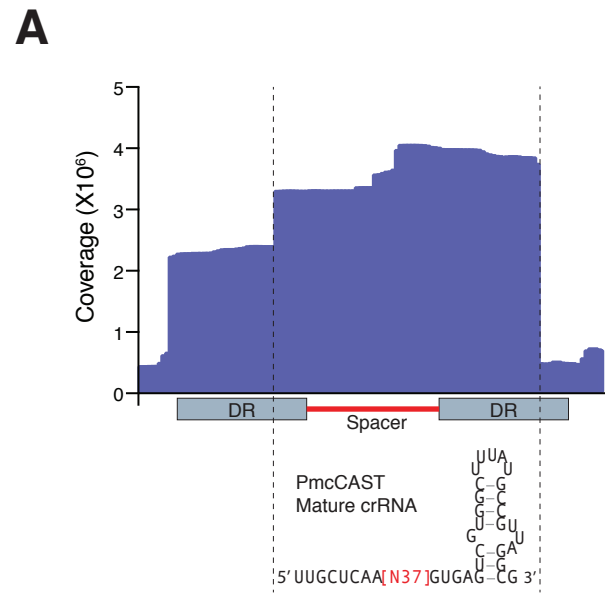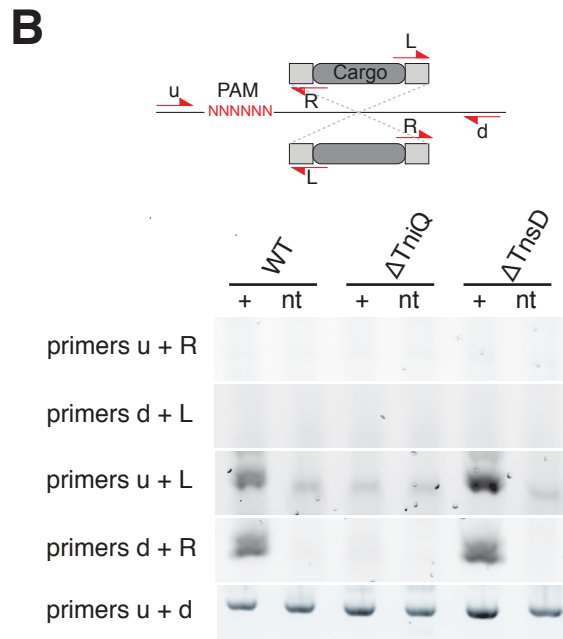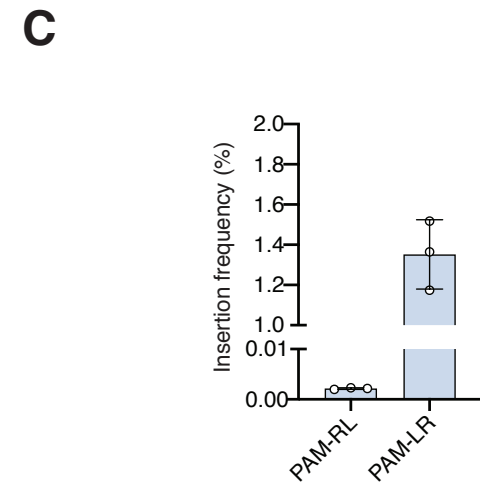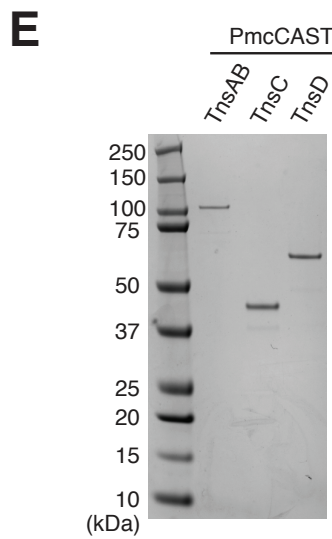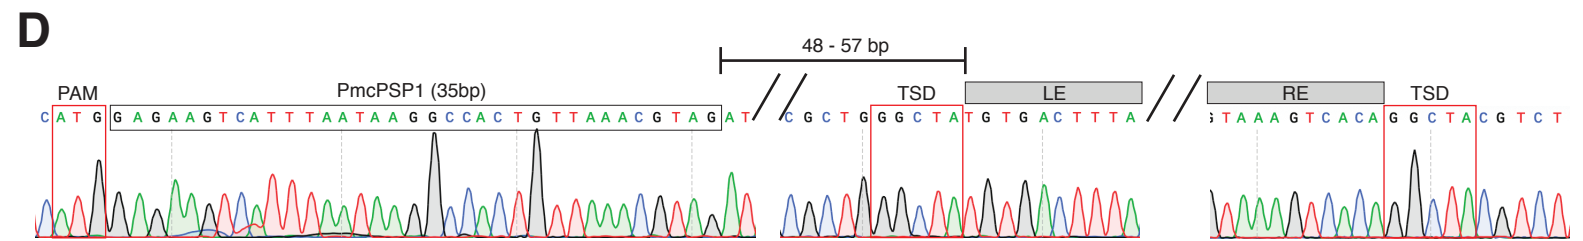

Supplement: NIHMS1716197-supplement-Figure_S6.pdf [file NIHMS1716197-supplement-Figure_S6.pdf]
